# Supplementary material
Source: publisher figshare collection journal article supplement (https://gsajournals.figshare.com/articles/dataset/_/8275307)
Supplement: Supplementary file 2 [file 1]

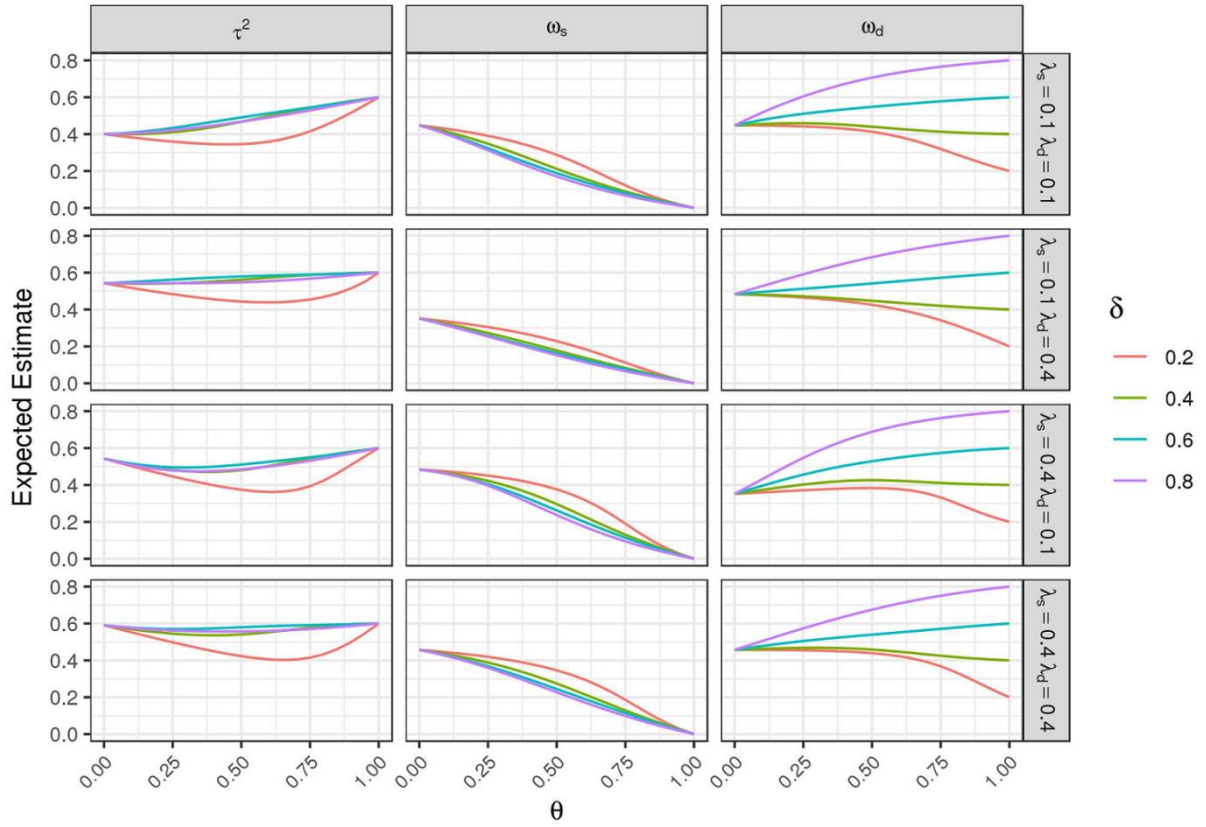

**FigureS2** : Expected estimates in the transmissibility model compared to parameters in the true model  $y_i = x_i\beta + a_i + \text{epi}_i + \text{sp}_i + e_i$

$H^2 = \frac{\sigma_a^2 + \sigma_{\text{epi}}^2 + \sigma_{\text{sp}}^2}{\sigma_a^2 + \sigma_{\text{epi}}^2 + \sigma_{\text{sp}}^2 + \sigma_e^2} = 0.6$ ,  $r = \frac{\sigma_a^2}{\sigma_a^2 + \sigma_{\text{epi}}^2 + \sigma_{\text{sp}}^2} = 0.5$ ,  $\delta = \frac{\sigma_{\text{sp}}^2}{\sigma_a^2 + \sigma_{\text{epi}}^2 + \sigma_{\text{sp}}^2}$ ,  $\delta$  = single parent path coefficient of transmission,  $\lambda_s, \lambda_d$  : sire and dam epigenetic path coefficients of transmission.

Parameters in the transmissibility model:  $\tau^2 = \frac{\sigma_t^2}{\sigma_t^2 + \sigma_e^2}$ ,  $\omega_s$  and  $\omega_d$  sire and dam path coefficient of transmission. Values in the transmissibility model have been obtained using the maximum of expected likelihood
